# Supplementary material
Source: bioRxiv or medRxiv preprint supplement (https://medrxiv.org/highwire/filestream/97075/field_highwire_adjunct_files/0/2020.09.14.20194191-1.pdf)
Supplement: Supplementary file [file 2020.09.14.20194191-1.pdf]

## Supplemental Material

Components of  
Result Disclosure  
Genetic Counseling  
Session

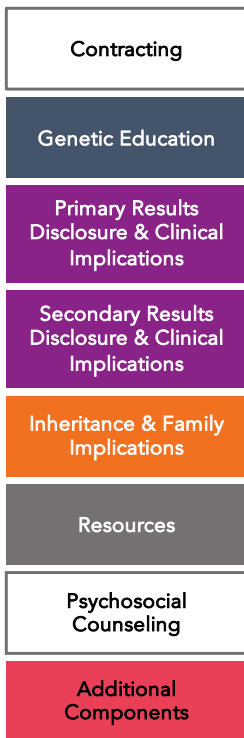

GUÍA Site Map

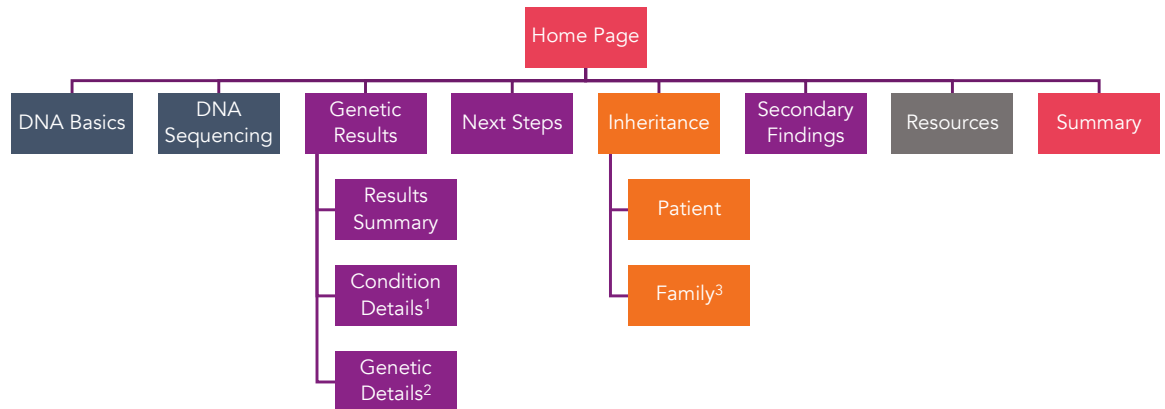

**Supplemental Figure 1. GUÍA pages mapped to the components of a genetic counseling result disclosure session.** Components of the genetic counseling session are displayed in the same color as the corresponding GUÍA page or subtab.

<sup>1</sup>Displayed for positive results only

<sup>2,3</sup>Displayed for positive and uncertain results only

Supplemental Table 1. GUÍA content colored to map to the GUÍA site map found in Supplemental Figure 1.

| Web page                                                              | Result category                          | Content                                                                                                                                                                                                                                                                                                                                                                                                                                                                                                                                                                                                                                                                           |
|-----------------------------------------------------------------------|------------------------------------------|-----------------------------------------------------------------------------------------------------------------------------------------------------------------------------------------------------------------------------------------------------------------------------------------------------------------------------------------------------------------------------------------------------------------------------------------------------------------------------------------------------------------------------------------------------------------------------------------------------------------------------------------------------------------------------------|
| <b>Genetic Education</b>                                              |                                          |                                                                                                                                                                                                                                                                                                                                                                                                                                                                                                                                                                                                                                                                                   |
| <b>DNA Basics</b>                                                     | All                                      | <ul style="list-style-type: none"> <li>• Explanation of what a gene is and what genes do in the body</li> <li>• Explanation of what DNA is and what the function of DNA is in the body</li> <li>• Description of a genetic variant</li> </ul>                                                                                                                                                                                                                                                                                                                                                                                                                                     |
| <b>DNA Sequencing</b>                                                 | All                                      | <ul style="list-style-type: none"> <li>• Explanation of the type of genetic test performed and why</li> <li>• Description of how DNA sequencing works</li> <li>• Possible results: positive, negative, uncertain, secondary findings</li> </ul>                                                                                                                                                                                                                                                                                                                                                                                                                                   |
| <b>Primary Results and Clinical Implications</b>                      |                                          |                                                                                                                                                                                                                                                                                                                                                                                                                                                                                                                                                                                                                                                                                   |
| <b>Results</b>                                                        | All                                      | <ul style="list-style-type: none"> <li>• Clinical interpretation of the results and explanation of what the results mean</li> <li>• Possibility for variant reclassification<sup>1</sup></li> </ul>                                                                                                                                                                                                                                                                                                                                                                                                                                                                               |
| <b>Condition Details</b>                                              | Positive                                 | <ul style="list-style-type: none"> <li>• Description of the associated condition and symptoms</li> <li>• Images of the body systems affected by the condition</li> <li>• Link to condition specific resource(s)</li> </ul>                                                                                                                                                                                                                                                                                                                                                                                                                                                        |
| <b>Genetic Details</b>                                                | Positive, Uncertain                      | <ul style="list-style-type: none"> <li>• Table displaying variant information: gene, genomic position, zygosity</li> <li>• Description of gene function</li> <li>• Link to gene specific resource(s)</li> </ul>                                                                                                                                                                                                                                                                                                                                                                                                                                                                   |
| <b>Next Steps</b>                                                     | All                                      | <ul style="list-style-type: none"> <li>• Clinical management recommendations (additional testing, treatment, referrals)</li> <li>• Link to resources (clinical trials)</li> </ul>                                                                                                                                                                                                                                                                                                                                                                                                                                                                                                 |
| <b>Inheritance and Family Implications</b>                            |                                          |                                                                                                                                                                                                                                                                                                                                                                                                                                                                                                                                                                                                                                                                                   |
| <b>Patient</b>                                                        | All                                      | <ul style="list-style-type: none"> <li>• Description of the inheritance pattern of the condition<sup>2</sup></li> <li>• Image showing inheritance pattern for the condition<sup>2</sup></li> <li>• Reproductive risk for patient</li> <li>• Link to information about genetic inheritance</li> </ul>                                                                                                                                                                                                                                                                                                                                                                              |
| <b>Family</b>                                                         | Positive, Uncertain                      | <ul style="list-style-type: none"> <li>• Reproductive risk for patient's parents<sup>3</sup></li> <li>• Image displaying inheritance pattern personalized for the patient<sup>2</sup></li> <li>• Recommendations for genetic testing of other family members</li> </ul>                                                                                                                                                                                                                                                                                                                                                                                                           |
| <b>Secondary Findings, Clinical Implications, Family Implications</b> |                                          |                                                                                                                                                                                                                                                                                                                                                                                                                                                                                                                                                                                                                                                                                   |
| <b>Secondary Findings</b>                                             | Positive and negative secondary findings | <ul style="list-style-type: none"> <li>• Description of secondary findings</li> <li>• Family's decision to opt-in or opt-out of receiving secondary findings</li> <li>• Clinical interpretation of results</li> <li>• Link to information about secondary findings</li> </ul>                                                                                                                                                                                                                                                                                                                                                                                                     |
|                                                                       | Positive secondary findings              | <ul style="list-style-type: none"> <li>• Description of the associated condition and symptoms</li> <li>• Table displaying variant information: gene, genomic position, zygosity</li> <li>• Description of the gene function</li> <li>• Link to gene specific resource(s)</li> <li>• Description of the inheritance pattern of the condition</li> <li>• Reproductive risk for patient and patient's parents</li> <li>• Recommendations for testing of other family members</li> <li>• Clinical management recommendations (e.g., additional testing, screening, treatment, referrals to specialists)</li> <li>• Links to information about condition, gene, inheritance</li> </ul> |
| <b>Resources</b>                                                      |                                          |                                                                                                                                                                                                                                                                                                                                                                                                                                                                                                                                                                                                                                                                                   |
| <b>Resources</b>                                                      | All                                      | <ul style="list-style-type: none"> <li>• Genetic counselor contact information</li> <li>• Links to additional resources</li> </ul>                                                                                                                                                                                                                                                                                                                                                                                                                                                                                                                                                |
| <b>Summary</b>                                                        |                                          |                                                                                                                                                                                                                                                                                                                                                                                                                                                                                                                                                                                                                                                                                   |
| <b>Test Summary</b>                                                   | All                                      | <ul style="list-style-type: none"> <li>• Clinical interpretation of primary results</li> <li>• Table displaying variant information: gene, genomic position, zygosity</li> <li>• Clinical management recommendations for primary positive or uncertain results</li> <li>• Clinical interpretation of secondary results</li> <li>• Genetic details for positive secondary results</li> <li>• Clinical management recommendations for positive secondary results</li> <li>• Genetic counselor contact information</li> <li>• Links to relevant resources</li> </ul>                                                                                                                 |

<sup>1</sup> Displayed for uncertain results; <sup>2</sup> Displayed for positive results; <sup>3</sup> Displayed for negative results; <sup>4</sup> Displayed for uncertain and negative results on the patient page

Supplemental Table 2: Examples of input from the Genomics Community Board and implications for GUÍA design and development

| Genomics Community Board Input                                                                                                                                                                                                                                               | Implication for GUÍA Design                                                                                                                                                                                   |
|------------------------------------------------------------------------------------------------------------------------------------------------------------------------------------------------------------------------------------------------------------------------------|---------------------------------------------------------------------------------------------------------------------------------------------------------------------------------------------------------------|
| <p>Use images to help explain complex concepts</p> <ul style="list-style-type: none"> <li>• Biology textbook type images are images that people are familiar with and may be a helpful trigger</li> </ul>                                                                    | <p><b>Consulted medical illustrators on the design of the illustrations</b></p>                                                                                                                               |
| <p>Results labeled as “negative” can be misunderstood to mean there are negative implications for a patient’s health</p> <ul style="list-style-type: none"> <li>• Define what negative result means with the phrase ‘no genetic cause found’</li> </ul>                      | <p><b>All result categories are defined</b></p>                                                                                                                                                               |
| <p>Secondary finding label does not have the same meaning for patients as it does for genetics professionals</p> <ul style="list-style-type: none"> <li>• Consider using another description, such as “other genetic results”</li> </ul>                                     | <p><b>Used the term ‘secondary findings’ for consistency across all study documents. The term is defined and there is a link provided to access additional information about this category of results</b></p> |
| <p>Patients can have limited understanding of the results and may lack social support</p> <ul style="list-style-type: none"> <li>• Include resources and consider connecting with a social worker who understands genetics</li> </ul>                                        | <p><b>Resources page can be personalized depending on the needs of the patient-participant</b></p>                                                                                                            |
| <p>Dark shading of the affected individual in an inheritance pattern illustration is not appropriate and potentially offensive</p> <ul style="list-style-type: none"> <li>• Consider using colors, patterns, or other methods to identify the affected individual</li> </ul> | <p><b>Color and labels were used to differentiate the affected and unaffected individuals in inheritance images</b></p>                                                                                       |
| <p>Be thoughtful about the amount of text displayed</p> <ul style="list-style-type: none"> <li>• Simplify the <i>Home Page</i> by removing text include in early iterations of the design</li> </ul>                                                                         | <p><b>Home Page contains only stand-alone titles</b></p>                                                                                                                                                      |
| <p>Should not expect patients to remember the type of testing performed</p> <ul style="list-style-type: none"> <li>• Remind patient of the testing that was performed</li> </ul>                                                                                             | <p><b>Learn About Sequencing page includes a reminder of the type of test performed and why; Secondary Findings page includes a reminder of opt-in/out decision</b></p>                                       |
| <p>Organ system images may be confusing</p> <ul style="list-style-type: none"> <li>• Consider displaying organ system illustrations within a body, or circling the affected organs</li> </ul>                                                                                | <p>Due to development limitations we could not implement this suggestion</p>                                                                                                                                  |
